# Supplementary material
Source: PubMed Central journal article supplement (PMC2923869)

```

> j<-lm(Glucan~Jar,data=theNIR)
> anova(j)
Analysis of Variance Table
Response: Glucan
          Df Sum Sq Mean Sq F value Pr(>F)
Jar         3 0.10041  0.03347   1.9731 0.1409
Residuals  28 0.47497  0.01696

> j<-lm(Xylan~Jar,data=theNIR)
> anova(j)
Analysis of Variance Table
Response: Xylan
          Df Sum Sq Mean Sq F value Pr(>F)
Jar         3 0.25310  0.08437   0.8442 0.4813
Residuals  28 2.79825  0.09994

> j<-lm(Lignin_p_cor~Jar,data=theNIR)
> anova(j)
Analysis of Variance Table
Response: Lignin_p_cor
          Df Sum Sq Mean Sq F value Pr(>F)
Jar         3 0.08644  0.02881   1.6015 0.2113
Residuals  28 0.50375  0.01799

> j<-lm(Total~Jar,data=theNIR)
> anova(j)
Analysis of Variance Table
Response: Total
          Df Sum Sq Mean Sq F value Pr(>F)
Jar         3 0.6948   0.2316   1.4285 0.2554
Residuals  28 4.5393   0.1621

> j<-lm(Glucan+Xylan+Lignin_p_cor+Total~Jar,data=theNIR)
> anova(j)
Analysis of Variance Table
Response: Glucan + Xylan + Lignin_p_cor + Total
          Df Sum Sq Mean Sq F value Pr(>F)
Jar         3 0.7194   0.2398   1.5007 0.2360
Residuals  28 4.4740   0.1598

```

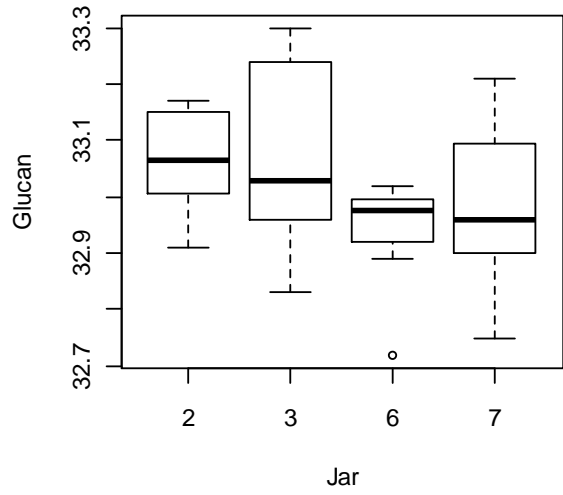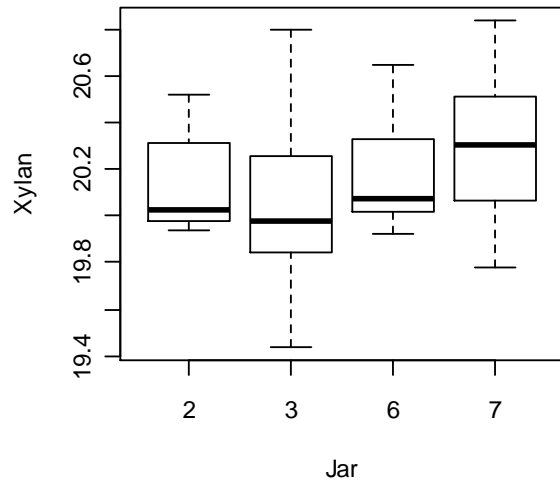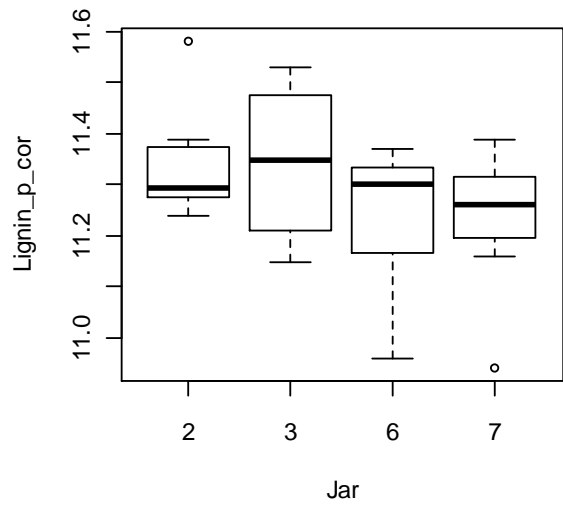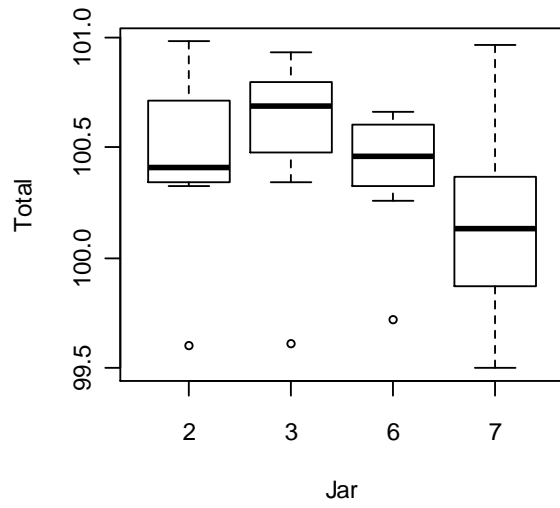

Supplement: jf100807b_si_006.pdf [file jf100807b_si_006.pdf]
